# Supplementary material for: Excessive Folic Acid Mimics Folate Deficiency in Human Lymphocytes
Source: MDPI journal article supplement (doi:10.3390/cimb44040097), 2022-03-23
Supplement: s1 [file s1]

# Excessive Folic Acid Mimics Folate Deficiency in Human Lymphocytes

Khadijah I. Alnabbat <sup>1,2</sup>, Ali M. Fardous <sup>1</sup>, Diane C. Cabelof <sup>1</sup>, and Ahmad R. Heydari <sup>1,3,\*</sup>

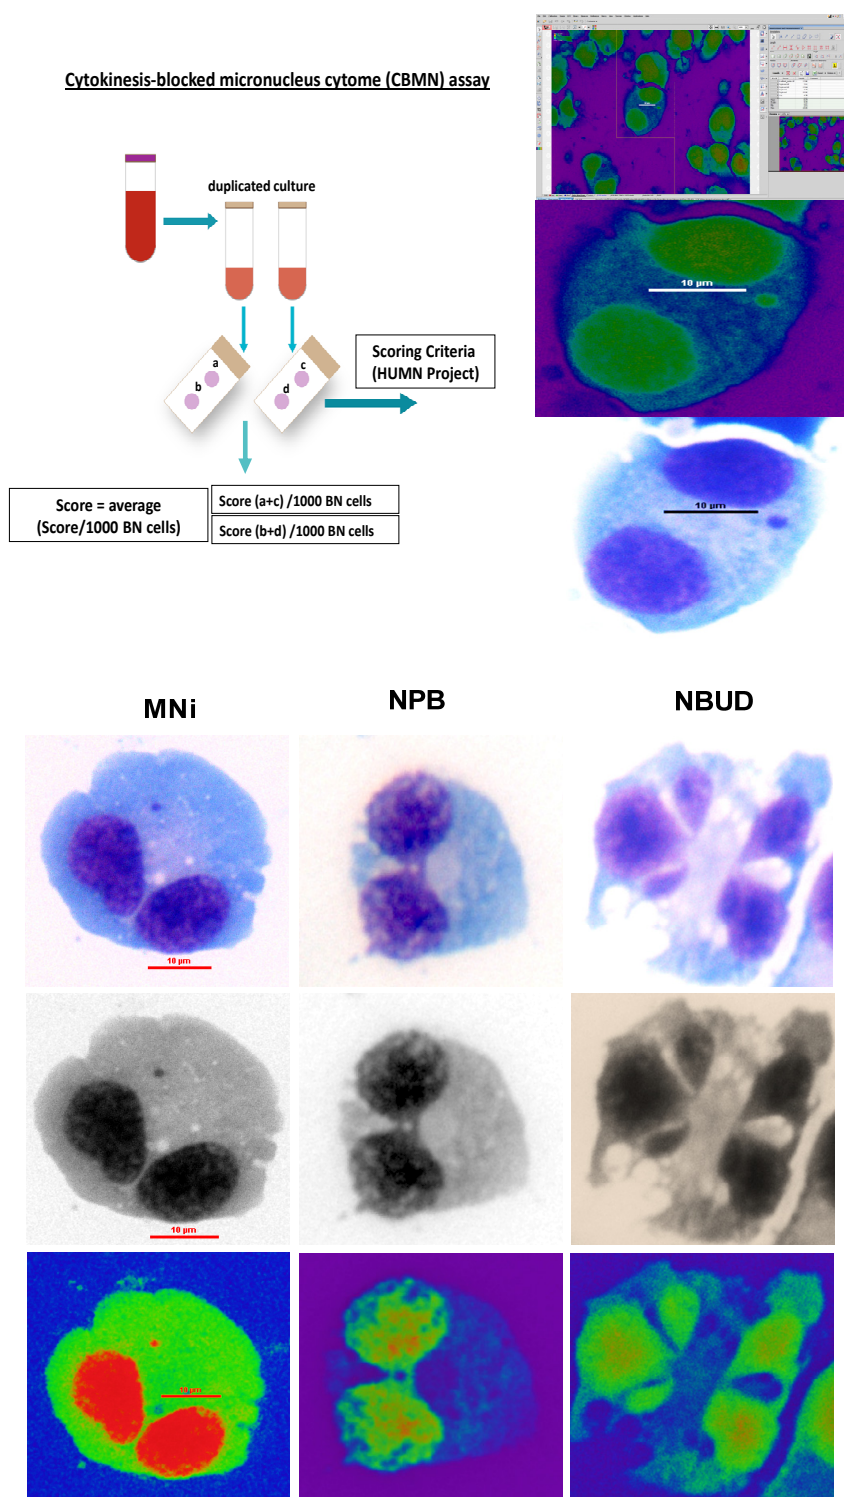

Supplementary Figure S1. CBMN assay schematic.

**Supplementary Table S1.** Qiagen-RT<sup>2</sup> qPCR Primers.

| Gene Symbol | Gene name                                 | NM_Number | Band Size | Reference position | Catalog number |
|-------------|-------------------------------------------|-----------|-----------|--------------------|----------------|
| HPRT1       | Hypoxanthine phosphoribosyl transferase 1 | NM_000194 | 57        | 332                | PPH01018C-200  |
| ACTB        | Beta Actin                                | NM_001101 | 174       | 730                | PPH00073G-200  |
| UNG         | Uracil-DNA glycosylase                    | NM_003362 | 84        | 2068               | PPH01727E-200  |
| POLB        | DNA Polymerase Beta                       | NM_002690 | 112       | 139                | PPH13735F-200  |
| RAD21       | Human RAD21 cohesion complex              | NM_006265 | 142       | 2124               | PPH10216A-200  |
